# Supplementary material for: Suppression of inflammatory arthritis in human serum paraoxonase 1 transgenic mice
Source: PubMed Central journal article supplement (PMC7546628; doi:10.1038/s41598-020-74016-w), 2020-10-08
Supplement: 41598_2020_74016_MOESM2_ESM.pdf [file 41598_2020_74016_MOESM2_ESM.pdf]

## **Suppression of Inflammatory Arthritis in Human Serum Paraoxonase 1 Transgenic Mice**

Christina Charles-Schoeman\*<sup>1</sup>, Jennifer Wang<sup>1</sup>, Ani Shahbazian<sup>1</sup>, Yuen Yin Lee<sup>1</sup>, Xiaoyan Wang<sup>2</sup>, Victor Grijalva<sup>3</sup>, Ernest Brahn<sup>1</sup>, Diana M. Shih<sup>3</sup>, Asokan Devarajan<sup>3</sup>, Christy Montano<sup>1</sup>, Aldons J. Lusis<sup>3,4</sup>, and Srinivasa T. Reddy<sup>3</sup>

From the Division of Rheumatology, Department of Medicine<sup>1</sup>, the Department of Medicine Statistics Core<sup>2</sup>, the Division of Cardiology Department of Medicine<sup>3</sup>, Departments of Human Genetics, Microbiology, Immunology, and Molecular Genetics<sup>4</sup>, at the University of California, Los Angeles, Los Angeles, CA 90095.

### **SUPPLEMENTARY DATA SECTION**

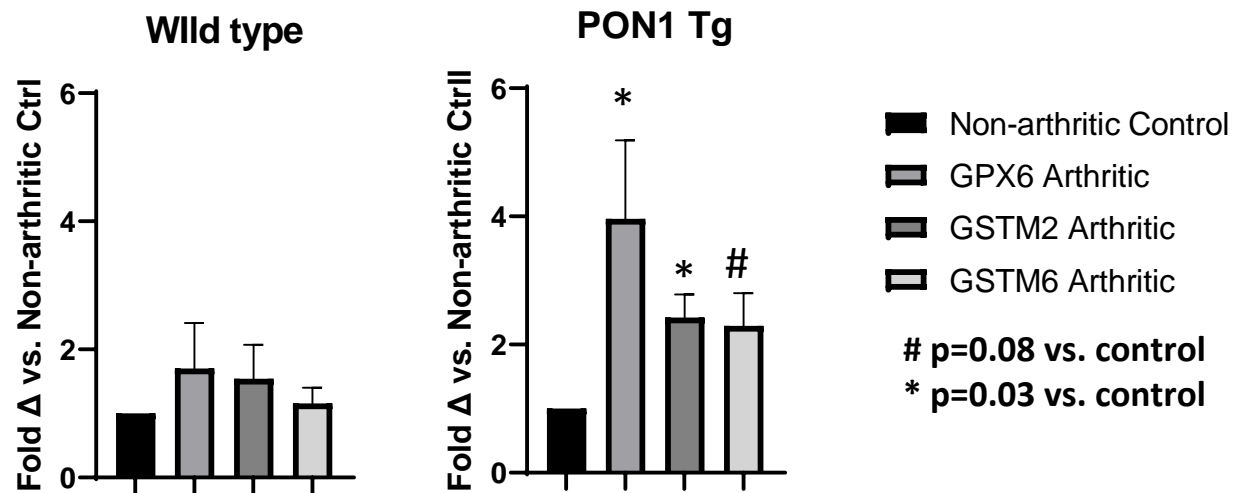

**Supplementary Figure 1. Increased Hepatic Glutathione Gene Expression in Arthritic PON1Tg Mice**

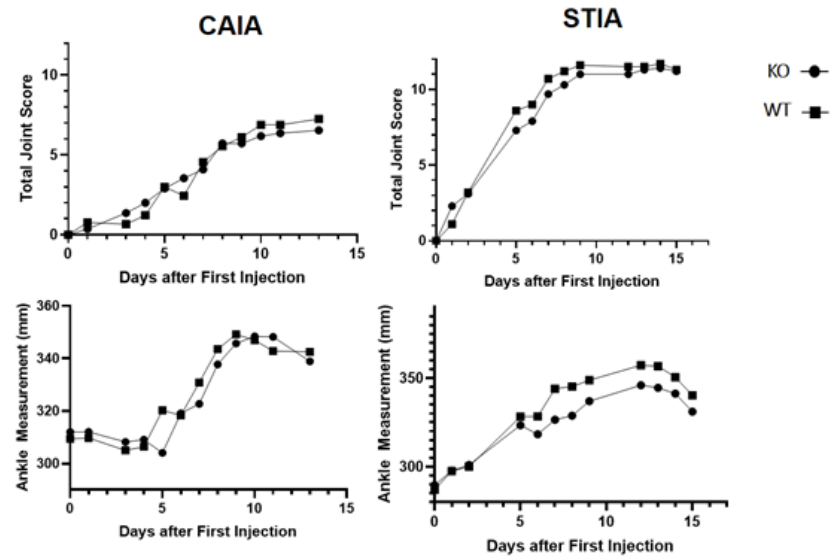

**A.**

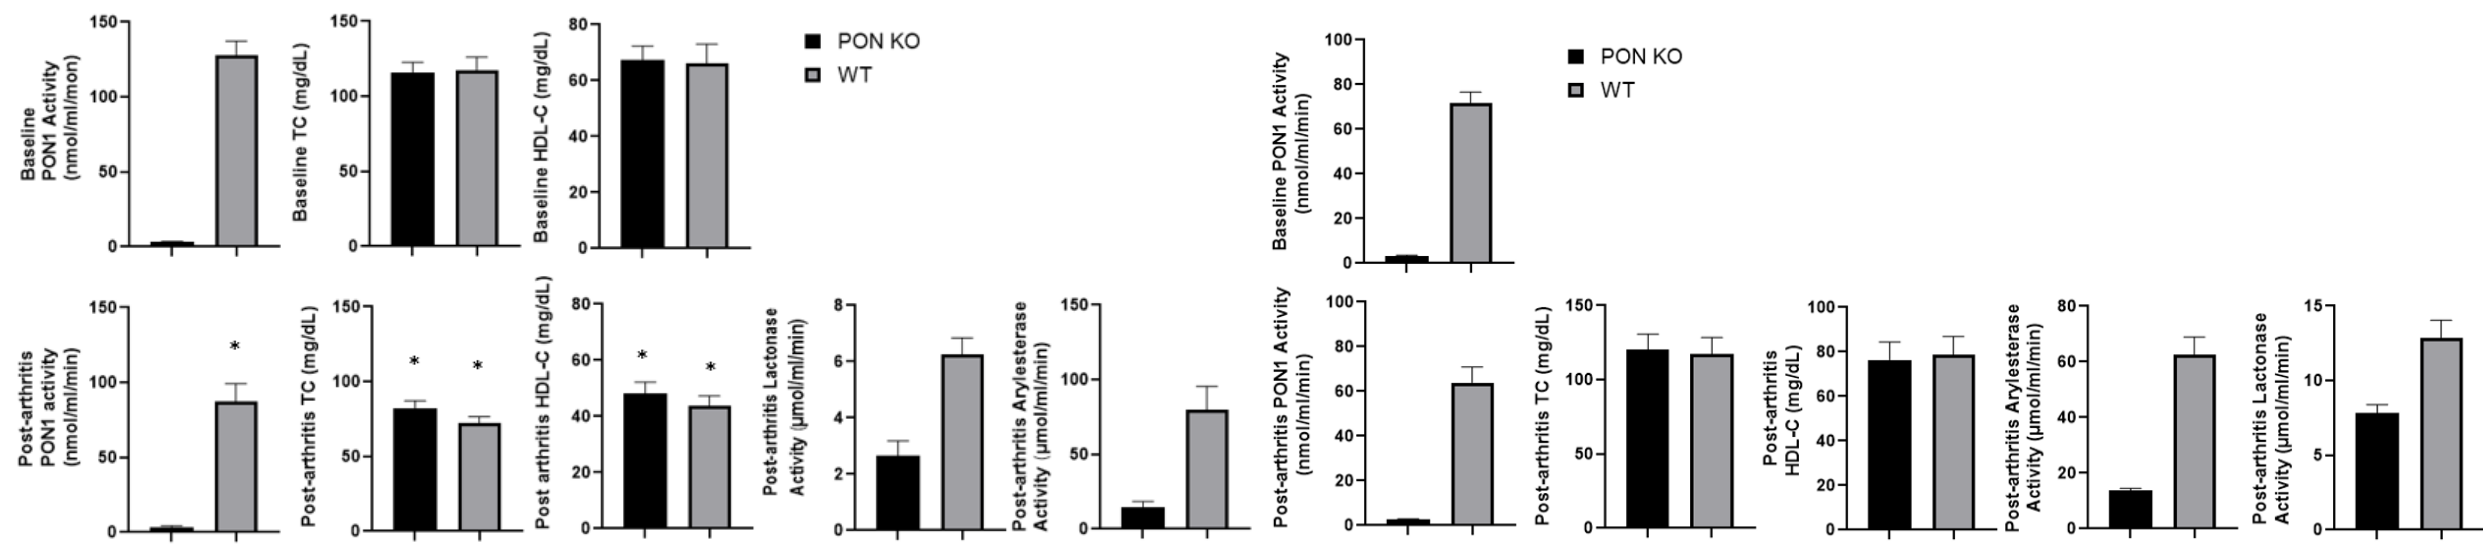

**B.**

**C.**

**Supplementary Figure 2. PON1 Knockout Mice and Controls Following Arthritis Induction.**

### Supplementary Figure 3. Increased Hepatic PON2 and PON3 Protein Expression in Arthritic PON1KO Mice

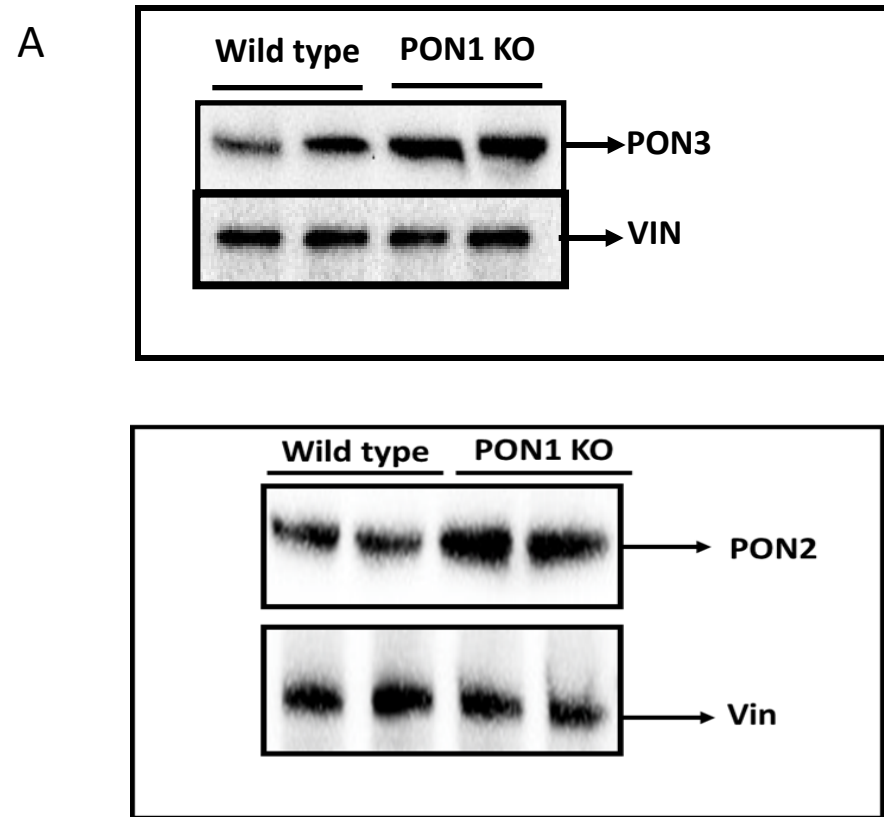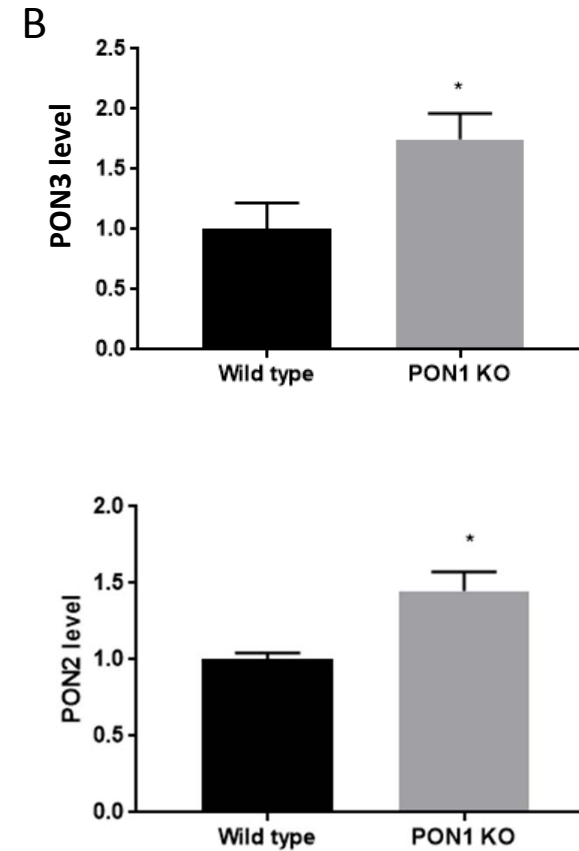

\* P < 0.05 compared to WT

C Paraoxonase 3 (40 kDa)

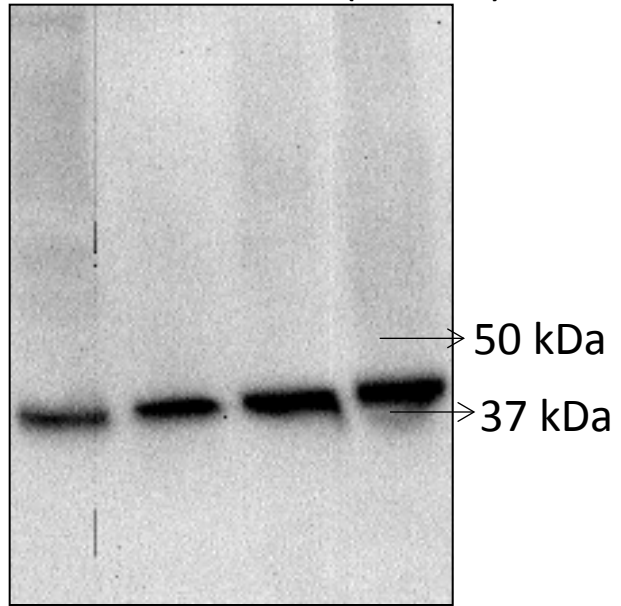

D Vinculin (115 kDa)

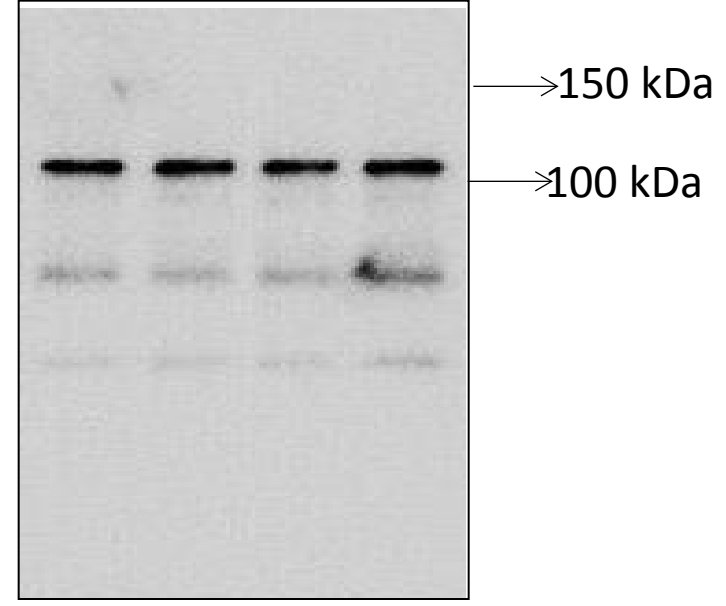

E Paraoxonase 2 (40 kDa)

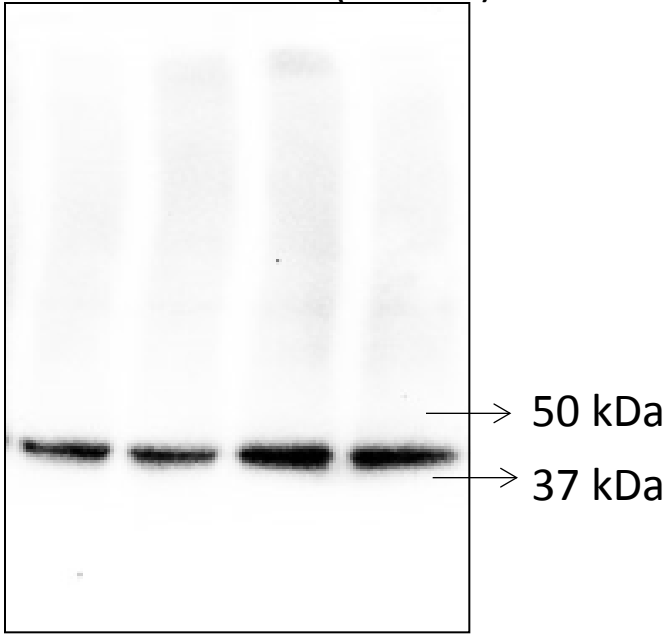

F Vinculin (115 kDa)

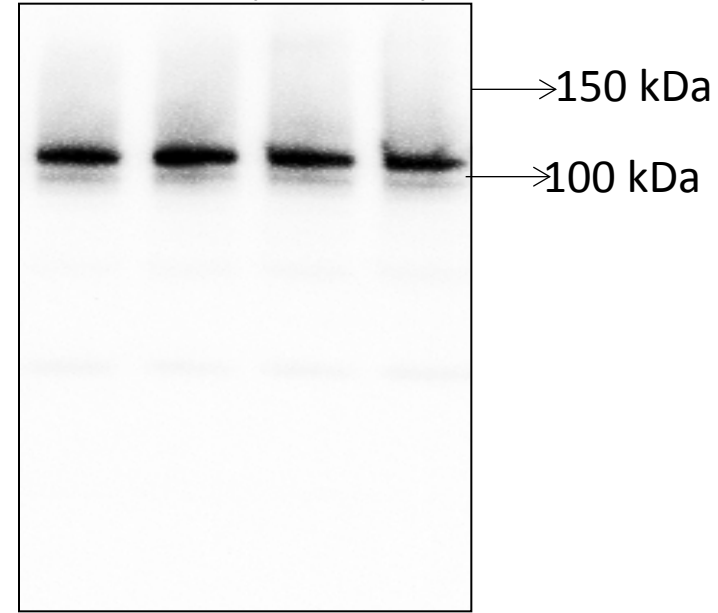

### Supplementary Table 1: Primer Pairs used for Real-Time Reverse Transcription-PCR

| Gene  | Primer Sequence 5'-3'                                               |
|-------|---------------------------------------------------------------------|
| GSTM1 | Forward: GCAGCTCATCATGCTCTGTT<br>Reverse: TTTTCTCAGGGATGGTCTTCA     |
| GSTA2 | Forward: TGCCTGCCTTTGAAAAGGTGT<br>Reverse: AAGGCTGGCATCAAGCTCTTC    |
| GSTM2 | Forward: CGCTTTGAGGGCCTGAAGAAGATA<br>Reverse: TAAGAGCTAGGGCCAGCAGAG |
| GSTM3 | Forward: GCCTGGATTTTCCCAATCTGC<br>Reverse: TCTCCAAAGTATCCACACGGA    |
| GSTM6 | Forward: TGGTTTGCAGGGGACAAGAT<br>Reverse: TTCCTCAGGCCCTCAAAGC       |
| GPX6  | Forward: CACATTGCAGGAGGAGCTGA<br>Reverse: GCCTGGACGCACATACTTGA      |
| GAPDH | Forward: TGAGGCCGGTGCTGAGTATGTCG<br>Reverse: CCACAGTCTTCTGGGTGGTG   |

**Supplementary Table 2: Genes Differentially Associated with Arthritis Activity in K/BxN Mice**

| <b>Gene ID</b> | <b>Fold Change</b> | <b>P value</b> | <b>Adjusted P value</b> |
|----------------|--------------------|----------------|-------------------------|
| Abcg1          | 14.97195           | 0.00004        | 0.05081                 |
| Arhgdib        | 22.47548           | 0.00004        | 0.05081                 |
| Atp11a         | 5.57669            | 0.00006        | 0.05081                 |
| C1qb           | 11.39285           | 0.00005        | 0.05081                 |
| Ccnd2          | 20.76950           | 0.00001        | 0.05081                 |
| Fcer1g         | 26.01673           | 0.00004        | 0.05081                 |
| Fcgr4          | 88.77787           | 0.00001        | 0.05081                 |
| Irf7           | 3.77039            | 0.00006        | 0.05081                 |
| Itgb2          | 51.48896           | 0.00004        | 0.05081                 |
| Laptm5         | 20.21389           | 0.00000        | 0.05081                 |
| Pld4           | 37.26168           | 0.00003        | 0.05081                 |
| Ptprc          | 31.74898           | 0.00002        | 0.05081                 |
| Tle1           | -3.04678           | 0.00006        | 0.05081                 |
| Tmsb4x         | 15.24136           | 0.00003        | 0.05081                 |
| Cyp2a22        | -4.29671           | 0.00008        | 0.05086                 |
| Plin5          | -6.76273           | 0.00007        | 0.05086                 |
| Srebf1         | 5.65882            | 0.00008        | 0.05086                 |
| Ucp2           | 9.89334            | 0.00008        | 0.05086                 |
| 4632428N05Rik  | 11.78662           | 0.00016        | 0.05266                 |
| Asb2           | 75.01430           | 0.00024        | 0.05266                 |
| Atp13a2        | 3.00608            | 0.00021        | 0.05266                 |
| C1qc           | 8.69364            | 0.00016        | 0.05266                 |
| Cd300ld        | 32.21202           | 0.00019        | 0.05266                 |
| Cdkn1a         | -13.31875          | 0.00021        | 0.05266                 |
| Clic1          | 4.78329            | 0.00026        | 0.05266                 |
| Csf1r          | 17.33508           | 0.00014        | 0.05266                 |
| Cxcl14         | 29.18718           | 0.00018        | 0.05266                 |
| Cybb           | 23.87605           | 0.00016        | 0.05266                 |
| Cyth4          | 38.90193           | 0.00023        | 0.05266                 |
| Dusp10         | 5.17288            | 0.00024        | 0.05266                 |
| Emr4           | 46.25871           | 0.00022        | 0.05266                 |
| Hck            | 38.47641           | 0.00022        | 0.05266                 |
| Hic1           | 6.07135            | 0.00022        | 0.05266                 |
| Iqgap1         | 15.85066           | 0.00017        | 0.05266                 |
| Irgm2          | 3.40389            | 0.00021        | 0.05266                 |
| Klhdc7a        | 4.49119            | 0.00015        | 0.05266                 |
| Lhpp           | -3.53249           | 0.00025        | 0.05266                 |
| Lrat           | 3.53765            | 0.00023        | 0.05266                 |
| Lyn            | 5.19388            | 0.00026        | 0.05266                 |
| Mnt            | 3.31750            | 0.00012        | 0.05266                 |
| Mob3a          | 5.59689            | 0.00016        | 0.05266                 |
| Msn            | 12.08807           | 0.00022        | 0.05266                 |

|          |            |         |         |
|----------|------------|---------|---------|
| Myo1f    | 24.65739   | 0.00024 | 0.05266 |
| Ngfr     | 4.35964    | 0.00024 | 0.05266 |
| Pkm      | 9.67482    | 0.00024 | 0.05266 |
| Prex1    | 7.61331    | 0.00019 | 0.05266 |
| Prps2    | 3.05312    | 0.00014 | 0.05266 |
| Selplg   | 25.22007   | 0.00018 | 0.05266 |
| Sirpa    | 13.98553   | 0.00013 | 0.05266 |
| Slc11a1  | 21.64922   | 0.00016 | 0.05266 |
| Sorl1    | 34.54970   | 0.00024 | 0.05266 |
| Spi1     | 18.43188   | 0.00021 | 0.05266 |
| Syk      | 26.02219   | 0.00017 | 0.05266 |
| Themis2  | 43.38085   | 0.00022 | 0.05266 |
| Tnfsf10  | 5.77717    | 0.00022 | 0.05266 |
| Wee1     | 6.76254    | 0.00019 | 0.05266 |
| Zfp516   | 3.78788    | 0.00015 | 0.05266 |
| Slc37a2  | 17.77988   | 0.00027 | 0.05344 |
| C1qa     | 7.51670    | 0.00028 | 0.05381 |
| Plekho2  | 15.01799   | 0.00028 | 0.05381 |
| Banp     | -4.35110   | 0.00032 | 0.05413 |
| Bmf      | 6.57341    | 0.00031 | 0.05413 |
| Cd97     | 11.98734   | 0.00031 | 0.05413 |
| Ezr      | 8.81776    | 0.00030 | 0.05413 |
| Mbp      | 35.63784   | 0.00032 | 0.05413 |
| Safb     | -3.35721   | 0.00030 | 0.05413 |
| Samhd1   | 6.77910    | 0.00031 | 0.05413 |
| Tpd52    | 4.51639    | 0.00031 | 0.05413 |
| Cd53     | 23.21007   | 0.00033 | 0.05542 |
| Ctss     | 9.08932    | 0.00034 | 0.05598 |
| Got1     | -3.50098   | 0.00037 | 0.05612 |
| Inf2     | 3.08688    | 0.00036 | 0.05612 |
| Irf5     | 7.73829    | 0.00040 | 0.05612 |
| Nlrp12   | -4.21970   | 0.00038 | 0.05612 |
| Pilra    | 28.53981   | 0.00035 | 0.05612 |
| Pld1     | 3.11646    | 0.00040 | 0.05612 |
| Rorc     | 3.62930    | 0.00038 | 0.05612 |
| Scd2     | 6.03027    | 0.00037 | 0.05612 |
| Slc25a22 | -3.95047   | 0.00041 | 0.05612 |
| Slc43a2  | 6.41105    | 0.00035 | 0.05612 |
| Sult2a6  | -165.27291 | 0.00038 | 0.05612 |
| Zeb2     | 7.41143    | 0.00038 | 0.05612 |
| Swap70   | 5.25019    | 0.00041 | 0.05612 |
| Unc93b1  | 3.39946    | 0.00043 | 0.05760 |
| Rac2     | 19.64857   | 0.00044 | 0.05784 |
| Sdc3     | 9.45987    | 0.00044 | 0.05784 |
| Tnfrsf14 | 10.54638   | 0.00046 | 0.05905 |



|               |           |         |         |
|---------------|-----------|---------|---------|
| Hcls1         | 12.85134  | 0.00047 | 0.05908 |
| Ly6e          | 3.07758   | 0.00046 | 0.05908 |
| G6pdx         | 11.58602  | 0.00050 | 0.05953 |
| Grem2         | 5.68589   | 0.00050 | 0.05953 |
| Itgal         | 27.15682  | 0.00050 | 0.05953 |
| Ms4a6c        | 14.44137  | 0.00049 | 0.05953 |
| Ptprj         | 3.95871   | 0.00052 | 0.05953 |
| Rassf5        | 3.18926   | 0.00052 | 0.05953 |
| Wdfy4         | 23.19815  | 0.00051 | 0.05953 |
| Ctsc          | 3.09276   | 0.00056 | 0.06266 |
| Eml6          | 82.98544  | 0.00056 | 0.06266 |
| Mapkapk3      | 7.69638   | 0.00055 | 0.06266 |
| Tyrobp        | 12.14921  | 0.00056 | 0.06266 |
| Fyb           | 13.31563  | 0.00057 | 0.06326 |
| 2310039H08Rik | -3.04507  | 0.00059 | 0.06357 |
| Cd300e        | 141.26631 | 0.00058 | 0.06357 |
| Pip4k2a       | 12.06037  | 0.00061 | 0.06357 |
| Rgs2          | 10.70828  | 0.00061 | 0.06357 |
| Slc25a34      | -4.09599  | 0.00061 | 0.06357 |
| Emr1          | 22.14801  | 0.00062 | 0.06385 |
| Plin4         | -7.23125  | 0.00062 | 0.06385 |
| Sash3         | 28.71144  | 0.00063 | 0.06399 |
| Fam129a       | 25.27438  | 0.00066 | 0.06414 |
| Fmnl1         | 36.22694  | 0.00065 | 0.06414 |
| Itga9         | 6.60679   | 0.00066 | 0.06414 |
| Phf11b        | 34.95135  | 0.00064 | 0.06414 |
| St8sia4       | 40.62112  | 0.00065 | 0.06414 |
| Gsap          | 3.46288   | 0.00068 | 0.06473 |
| Snn           | 9.33551   | 0.00070 | 0.06473 |
| Ston2         | 3.94497   | 0.00068 | 0.06473 |
| Tk1           | 3.23823   | 0.00068 | 0.06473 |
| AB124611      | 12.86106  | 0.00072 | 0.06490 |
| Clec4a3       | 47.49841  | 0.00072 | 0.06490 |
| Coro1a        | 19.95353  | 0.00072 | 0.06490 |
| Cyth3         | 9.78856   | 0.00075 | 0.06490 |
| Fcgr1         | 14.62505  | 0.00076 | 0.06490 |
| Folr2         | 8.59507   | 0.00073 | 0.06490 |
| Lcp2          | 29.53764  | 0.00075 | 0.06490 |
| Tln1          | 3.26809   | 0.00072 | 0.06490 |
| Tmem82        | -3.13460  | 0.00074 | 0.06490 |
| Top2a         | 12.61896  | 0.00076 | 0.06490 |
| Arl4c         | 9.74655   | 0.00079 | 0.06650 |
| Wipf1         | 7.05382   | 0.00079 | 0.06650 |
| Ptpn6         | 3.67467   | 0.00081 | 0.06735 |
| Fxyd5         | 7.87133   | 0.00084 | 0.06768 |

|               |            |         |         |
|---------------|------------|---------|---------|
| Ckb           | 13.07818   | 0.00085 | 0.06841 |
| Dclk3         | 3.05195    | 0.00089 | 0.06931 |
| Phospho1      | -5.80528   | 0.00089 | 0.06931 |
| Sult2a4       | -131.22596 | 0.00089 | 0.06931 |
| Fam49b        | 5.99834    | 0.00091 | 0.07031 |
| Flna          | 9.06952    | 0.00091 | 0.07031 |
| Tnfaip2       | 4.13439    | 0.00092 | 0.07058 |
| Evl           | 17.40789   | 0.00093 | 0.07085 |
| 1600002H07Rik | -3.45080   | 0.00095 | 0.07136 |
| Bin2          | 17.36194   | 0.00097 | 0.07136 |
| Eif4ebp3      | -5.15250   | 0.00099 | 0.07136 |
| I830012O16Rik | 3.98598    | 0.00098 | 0.07136 |
| Lrfn3         | -3.15587   | 0.00096 | 0.07136 |
| Pilrb1        | 118.86397  | 0.00097 | 0.07136 |
| Ppm1h         | 8.39953    | 0.00099 | 0.07136 |
| Pygb          | 5.74490    | 0.00099 | 0.07136 |
| Clec12a       | 21.68960   | 0.00100 | 0.07156 |
| Apex2         | -3.78328   | 0.00101 | 0.07166 |
| Ablim3        | -3.01647   | 0.00103 | 0.07292 |
| Rasa3         | 5.25115    | 0.00104 | 0.07292 |
| Tbc1d1        | 6.33669    | 0.00104 | 0.07297 |
| Brca2         | 3.19913    | 0.00105 | 0.07337 |
| Apobr         | 18.28704   | 0.00109 | 0.07378 |
| Axl           | 8.61888    | 0.00108 | 0.07378 |
| Ccdc88b       | 16.39637   | 0.00111 | 0.07378 |
| Cd5l          | 10.92174   | 0.00112 | 0.07378 |
| Clec4f        | 3.97400    | 0.00108 | 0.07378 |
| Cth           | -3.17690   | 0.00108 | 0.07378 |
| Fam117a       | 6.48236    | 0.00112 | 0.07378 |
| Pla2g15       | 3.13165    | 0.00108 | 0.07378 |
| Plin2         | -3.72976   | 0.00112 | 0.07378 |
| Pltp          | 6.56760    | 0.00113 | 0.07378 |
| Cd300a        | 6.38887    | 0.00114 | 0.07383 |
| Spn           | 52.17953   | 0.00114 | 0.07383 |
| Acsl3         | 4.20942    | 0.00121 | 0.07447 |
| Actg1         | 4.42489    | 0.00116 | 0.07447 |
| Asl           | -3.00147   | 0.00123 | 0.07447 |
| Cd79b         | 26.16901   | 0.00117 | 0.07447 |
| Chst2         | 6.73807    | 0.00119 | 0.07447 |
| Cmtm7         | 10.31284   | 0.00119 | 0.07447 |
| Gbp10         | 6.16800    | 0.00123 | 0.07447 |
| Kbtbd11       | 25.81244   | 0.00121 | 0.07447 |
| Nfam1         | 14.60865   | 0.00123 | 0.07447 |
| Rgs10         | 10.85387   | 0.00122 | 0.07447 |
| Tgfbr2        | 3.79455    | 0.00123 | 0.07447 |

|               |           |         |         |
|---------------|-----------|---------|---------|
| Clec4a1       | 73.59963  | 0.00125 | 0.07464 |
| Lamb3         | -5.79360  | 0.00125 | 0.07464 |
| Lbh           | 3.52748   | 0.00127 | 0.07519 |
| Sco2          | -5.98731  | 0.00126 | 0.07519 |
| Cotl1         | 5.31121   | 0.00129 | 0.07568 |
| 3930402G23Rik | -27.02894 | 0.00131 | 0.07615 |
| Pla2g12a      | -3.08666  | 0.00133 | 0.07615 |
| Plcg2         | 21.84479  | 0.00133 | 0.07615 |
| Sptb          | 17.77251  | 0.00136 | 0.07740 |
| Tifab         | 9.91923   | 0.00138 | 0.07788 |
| Ano6          | 5.00974   | 0.00147 | 0.07850 |
| Bhlhe40       | 3.08972   | 0.00147 | 0.07850 |
| Gm11710       | 474.58898 | 0.00149 | 0.07850 |
| Gm11711       | 474.58898 | 0.00149 | 0.07850 |
| Lair1         | 19.18961  | 0.00148 | 0.07850 |
| Lfng          | 11.45276  | 0.00146 | 0.07850 |
| Rbl1          | 9.71605   | 0.00146 | 0.07850 |
| Lcp1          | 3.55626   | 0.00156 | 0.07882 |
| Sowahc        | 5.37644   | 0.00155 | 0.07882 |
| 1810055G02Rik | -3.77506  | 0.00158 | 0.07920 |
| Limd2         | 3.85052   | 0.00158 | 0.07920 |
| Dock2         | 17.15272  | 0.00160 | 0.07986 |
| Apobec1       | 3.53690   | 0.00163 | 0.07990 |
| Cd68          | 13.15127  | 0.00165 | 0.07990 |
| Lpcat2        | 9.10005   | 0.00162 | 0.07990 |
| Mpeg1         | 5.47182   | 0.00163 | 0.07990 |
| Tifa          | 3.65685   | 0.00164 | 0.07990 |
| Cd180         | 41.73947  | 0.00166 | 0.08008 |
| Myo9a         | 9.72526   | 0.00168 | 0.08037 |
| 2010003K11Rik | -7.67773  | 0.00174 | 0.08078 |
| Apbb1ip       | 18.24973  | 0.00178 | 0.08078 |
| Atf5          | -3.27885  | 0.00171 | 0.08078 |
| Epb4.1l3      | 14.59174  | 0.00173 | 0.08078 |
| Lgals3        | 13.30669  | 0.00173 | 0.08078 |
| Sirpb1b       | 226.06604 | 0.00175 | 0.08078 |
| Tmed5         | -3.24887  | 0.00173 | 0.08078 |
| Tnfrsf12a     | -3.65775  | 0.00176 | 0.08078 |
| Fes           | 9.29764   | 0.00180 | 0.08083 |
| Itgam         | 34.00564  | 0.00179 | 0.08083 |
| Lrrc25        | 24.72874  | 0.00181 | 0.08083 |
| Akr1b10       | 13.29758  | 0.00182 | 0.08102 |
| Gngt2         | 17.89130  | 0.00192 | 0.08230 |
| Insig2        | -3.76804  | 0.00194 | 0.08230 |
| Mllt3         | 3.50795   | 0.00194 | 0.08230 |
| Nr1d1         | -5.88233  | 0.00194 | 0.08230 |

|               |          |         |         |
|---------------|----------|---------|---------|
| Plekha2       | 5.95938  | 0.00190 | 0.08230 |
| Siglece       | 19.58295 | 0.00191 | 0.08230 |
| Adamdec1      | 31.68485 | 0.00196 | 0.08259 |
| Cd72          | 45.53050 | 0.00200 | 0.08282 |
| Lnpep         | 7.14756  | 0.00198 | 0.08282 |
| Pycard        | 43.24472 | 0.00198 | 0.08282 |
| Vasp          | 4.20947  | 0.00200 | 0.08282 |
| Ncoa7         | 8.63056  | 0.00204 | 0.08331 |
| Negr1         | 80.39327 | 0.00203 | 0.08331 |
| Aldh18a1      | 11.79760 | 0.00211 | 0.08428 |
| Ccr5          | 9.59908  | 0.00207 | 0.08428 |
| Naip2         | 5.10185  | 0.00209 | 0.08428 |
| Nckap1l       | 15.59334 | 0.00208 | 0.08428 |
| Syne3         | 3.20094  | 0.00211 | 0.08428 |
| Adap1         | 55.94309 | 0.00217 | 0.08516 |
| Atad5         | 6.11654  | 0.00224 | 0.08516 |
| Itgax         | 93.06149 | 0.00219 | 0.08516 |
| Mical1        | 17.86479 | 0.00222 | 0.08516 |
| Plek          | 26.50022 | 0.00224 | 0.08516 |
| Tagln2        | 4.52065  | 0.00219 | 0.08516 |
| Tnfrsf21      | 4.45653  | 0.00220 | 0.08516 |
| Zbtb4         | 3.32267  | 0.00217 | 0.08516 |
| Slfn8         | 8.62099  | 0.00227 | 0.08609 |
| Inpp5d        | 11.59578 | 0.00233 | 0.08675 |
| Prkcb         | 10.13485 | 0.00232 | 0.08675 |
| St6galnac4    | 7.88943  | 0.00233 | 0.08675 |
| Stk17b        | 13.82644 | 0.00233 | 0.08675 |
| Vsig4         | 9.80301  | 0.00234 | 0.08675 |
| C630043F03Rik | -3.11088 | 0.00239 | 0.08704 |
| Cnn2          | 6.71362  | 0.00240 | 0.08704 |
| Dock10        | 19.84142 | 0.00239 | 0.08704 |
| Kcna2         | 5.93869  | 0.00239 | 0.08704 |
| Pirb          | 19.42316 | 0.00241 | 0.08704 |
| Atp8a1        | 5.68349  | 0.00244 | 0.08734 |
| Map3k3        | 3.07737  | 0.00245 | 0.08746 |
| Tlr9          | 30.48599 | 0.00247 | 0.08776 |
| 6430548M08Rik | 8.41122  | 0.00248 | 0.08782 |
| Capn5         | 7.52584  | 0.00248 | 0.08782 |
| Apoa1         | -3.05394 | 0.00250 | 0.08801 |
| Sik1          | 5.01193  | 0.00253 | 0.08846 |
| Abi3          | 6.54462  | 0.00260 | 0.08993 |
| Fcna          | 4.31650  | 0.00259 | 0.08993 |
| Rab3il1       | 5.61399  | 0.00259 | 0.08993 |
| Ptpn22        | 36.96771 | 0.00267 | 0.09084 |
| Cd52          | 19.42930 | 0.00270 | 0.09089 |

|                |           |         |         |
|----------------|-----------|---------|---------|
| Cd44           | 9.76030   | 0.00272 | 0.09156 |
| Aldh3b1        | 5.60537   | 0.00275 | 0.09181 |
| 9930111J21Rik2 | 137.02309 | 0.00282 | 0.09239 |
| Cxcl9          | 7.47488   | 0.00287 | 0.09239 |
| Ehbp1l1        | 5.14969   | 0.00287 | 0.09239 |
| Ehd4           | 3.83021   | 0.00287 | 0.09239 |
| Elf4           | 10.97817  | 0.00285 | 0.09239 |
| Heg1           | 8.22429   | 0.00282 | 0.09239 |
| Pdcd1lg2       | 124.28412 | 0.00283 | 0.09239 |
| Rbm43          | 3.61834   | 0.00279 | 0.09239 |
| Rinl           | 6.07197   | 0.00293 | 0.09351 |
| Dsg1c          | 7.31658   | 0.00297 | 0.09431 |
| Cd86           | 8.16747   | 0.00309 | 0.09482 |
| Esr1           | 5.78970   | 0.00301 | 0.09482 |
| Fam78a         | 15.20826  | 0.00304 | 0.09482 |
| Fdft1          | 3.98840   | 0.00309 | 0.09482 |
| Gm4794         | -26.50556 | 0.00300 | 0.09482 |
| Igsf8          | 3.34740   | 0.00301 | 0.09482 |
| Prss53         | -3.69996  | 0.00303 | 0.09482 |
| Rnf144a        | 4.85622   | 0.00308 | 0.09482 |
| Slc30a10       | -3.06029  | 0.00302 | 0.09482 |
| Tmem229b       | 9.80778   | 0.00307 | 0.09482 |
| Apba1          | 42.02999  | 0.00314 | 0.09563 |
| Apol11b        | 191.23443 | 0.00320 | 0.09563 |
| Etv5           | 5.54066   | 0.00315 | 0.09563 |
| Gm13157        | 4.65148   | 0.00317 | 0.09563 |
| Grap2          | 131.56067 | 0.00324 | 0.09563 |
| Ifi204         | 6.60444   | 0.00327 | 0.09563 |
| Klra2          | 32.88885  | 0.00322 | 0.09563 |
| Ppfia4         | 7.16514   | 0.00317 | 0.09563 |
| Rtp4           | 3.08538   | 0.00321 | 0.09563 |
| Al467606       | 14.67610  | 0.00344 | 0.09636 |
| Bag3           | -3.27654  | 0.00338 | 0.09636 |
| Bank1          | 9.63987   | 0.00337 | 0.09636 |
| Camkk1         | 27.27182  | 0.00348 | 0.09636 |
| Elovl3         | -11.96817 | 0.00338 | 0.09636 |
| Lepr           | -6.16970  | 0.00350 | 0.09636 |
| Ntrk1          | -14.08933 | 0.00347 | 0.09636 |
| Plxnb3         | 42.59796  | 0.00344 | 0.09636 |
| Prdm1          | 10.59251  | 0.00343 | 0.09636 |
| Ptplad2        | 11.64439  | 0.00343 | 0.09636 |
| Snx20          | 26.70192  | 0.00348 | 0.09636 |
| Tgfb1          | 6.91209   | 0.00345 | 0.09636 |
| Mki67          | 19.24766  | 0.00352 | 0.09661 |
| Ccl6           | 10.22734  | 0.00353 | 0.09673 |

|               |          |         |         |
|---------------|----------|---------|---------|
| Ly75          | 6.91967  | 0.00357 | 0.09717 |
| Slc15a3       | 11.26886 | 0.00358 | 0.09717 |
| Akna          | 7.89589  | 0.00362 | 0.09773 |
| Endod1        | 3.91900  | 0.00366 | 0.09773 |
| Hmgb2         | 4.20491  | 0.00368 | 0.09773 |
| Kcnab2        | 18.63330 | 0.00368 | 0.09773 |
| Apoa4         | -3.17309 | 0.00375 | 0.09805 |
| Snx10         | 3.30616  | 0.00374 | 0.09805 |
| Abr           | 6.70066  | 0.00382 | 0.09882 |
| Gm1966        | 8.51361  | 0.00382 | 0.09882 |
| A730008H23Rik | 3.84028  | 0.00387 | 0.09956 |

**Supplementary Table 3: Clinical and Laboratory Characteristics of Patients with Rheumatoid Arthritis and Healthy Controls**

|                           | Control    | RA         | RA-Ath       |
|---------------------------|------------|------------|--------------|
| Age (years)               | 63 ± 9     | 65 ± 7     | 68 ± 6       |
| Sex (% female)            | 81         | 88         | 75           |
| Ethnicity (% hispanic)    | 13         | 19         | 31           |
| Race (% caucasian)        | 81         | 88         | 75           |
| ESR (mm/hr)               | 10 ± 9#    | 13 ± 10#   | 44 ± 36*     |
| HSCRp (mg/L)              | 1.5 ± 1.8# | 1.8 ± 3.6# | 19.5 ± 22.3* |
| Total Cholesterol (mg/dL) | 184 ± 24   | 188 ± 33   | 164 ± 38     |
| HDL Cholesterol (mg/dL)   | 62 ± 17#   | 85 ± 23#   | 58 ± 21*     |
| LDL Cholesterol (mg/dL)   | 104 ± 23#  | 96 ± 34    | 79 ± 29*     |
| Triglycerides (mg/dL)     | 112 ± 54   | 73 ± 27*#  | 153 ± 105    |

RA-Ath: Rheumatoid Arthritis with carotid plaque on carotid ultrasound. RA: Rheumatoid Arthritis without carotid plaque. \*p<0.05 compared to control. #p<0.05 compared to RA-Ath.

**Supplementary Table 4: Association of BLMs with Clinical and Histologic Scores in Arthritic Mice**

|                 | Clinical Score | Histology    |                   |              |
|-----------------|----------------|--------------|-------------------|--------------|
|                 |                | Inflammation | Cartilage Erosion | Bone erosion |
| <b>BLMs</b>     |                |              |                   |              |
| TXB2            | -0.49#         | 0.43#        | 0.37              | 0.43#        |
| 6t12epiLTB4     | 0.33           | 0.15         | 0.21              | 0.31         |
| LTB4            | 0.46*          | 0.59*        | 0.51*             | 0.68*        |
| 15d-D12,14 PGJ2 | 0.48*          | 0.61*        | 0.57*             | 0.69*        |
| 13 HODE         | 0.71*          | 0.74*        | 0.74*             | 0.79*        |
| 9 HODE          | 0.65*          | 0.75*        | 0.72*             | 0.79*        |
| 17S-HDHA        | 0.72*          | 0.64*        | 0.58*             | 0.62*        |
| 15 HETE         | 0.67*          | 0.70*        | 0.66*             | 0.72*        |
| 14S-HDHA        | 0.59*          | 0.39#        | 0.51*             | 0.47*        |
| 11 HETE         | 0.48*          | 0.72*        | 0.66*             | 0.73*        |
| 12 HETE         | 0.46*          | 0.22         | 0.37              | 0.32         |
| 5 HETE          | 0.35#          | 0.64*        | 0.51*             | 0.60*        |
| 5-oxoETE        | 0.68*          | 0.76*        | 0.71*             | 0.76*        |

\* p<0.05, # p≤ 0.1.



**Supplementary Table 5: Genes Differentially Regulated in PON1Tg Mice Compared to WT Mice following Arthritis Induction**

| <b>Gene ID</b> | <b>Fold Change</b> | <b>P value</b> | <b>Adjusted P value</b> |
|----------------|--------------------|----------------|-------------------------|
| Ethe1          | 4.35995            | 0.00003        | 0.40209                 |
| Gstm1          | 3.34495            | 0.00007        | 0.43121                 |
| Gstm3          | 11.93905           | 0.00011        | 0.46774                 |
| Tmie           | 2.87885            | 0.00018        | 0.56027                 |
| Fam198a        | 5.43446            | 0.00030        | 0.70660                 |
| Gpcpd1         | -3.91164           | 0.00036        | 0.70660                 |
| Mad2l2         | 2.35727            | 0.00052        | 0.70660                 |
| Ptplad1        | -2.17633           | 0.00055        | 0.70660                 |
| Dhrs3          | 2.03693            | 0.00072        | 0.70660                 |
| Ldha           | -2.23318           | 0.00080        | 0.70660                 |
| Psen2          | 2.18119            | 0.00083        | 0.70660                 |
| Chka           | 3.08320            | 0.00090        | 0.70660                 |
| Rn45s          | -6.31166           | 0.00090        | 0.70660                 |
| Cdkn1c         | 2.38700            | 0.00091        | 0.70660                 |
| Nr0b2          | 4.55830            | 0.00096        | 0.70660                 |
| Gstm6          | 2.54077            | 0.00103        | 0.70660                 |
| Serpina3n      | -2.09340           | 0.00106        | 0.70660                 |
| Cyp4a31        | -3.61811           | 0.00115        | 0.70660                 |
| Arl10          | -3.51879           | 0.00123        | 0.70660                 |
| Pnkd           | 2.26669            | 0.00124        | 0.70660                 |
| Slc13a2        | 6.15249            | 0.00132        | 0.72095                 |
| Slc22a5        | -2.73990           | 0.00152        | 0.76335                 |
| Gm4724         | 5.48853            | 0.00184        | 0.79679                 |
| 1500017E21Rik  | 5.10523            | 0.00208        | 0.84073                 |
| Cd300lg        | 2.09548            | 0.00228        | 0.84073                 |
| Tjp3           | 2.31474            | 0.00251        | 0.84073                 |
| Tmed8          | -2.04537           | 0.00256        | 0.84073                 |
| Rasal2         | -2.19521           | 0.00258        | 0.84073                 |
| Mcu            | 2.03322            | 0.00267        | 0.84073                 |
| Fhod1          | 2.13868            | 0.00303        | 0.84073                 |
| Hspa1b         | -4.16829           | 0.00312        | 0.84073                 |
| Adck3          | 2.79351            | 0.00318        | 0.84073                 |
| Xpnpep3        | -2.45631           | 0.00326        | 0.84073                 |
| Smim1          | 3.43390            | 0.00337        | 0.84073                 |
| Cpt1a          | -2.19779           | 0.00346        | 0.84073                 |
| Chrna2         | -2.93470           | 0.00357        | 0.84073                 |
| Fxyd3          | 7.58036            | 0.00361        | 0.84073                 |
| Tmem41a        | -2.00465           | 0.00393        | 0.85496                 |
| Gstm2          | 2.42130            | 0.00395        | 0.85496                 |
| Chst14         | 3.68976            | 0.00406        | 0.85496                 |

|            |          |         |         |
|------------|----------|---------|---------|
| Lars2      | -3.13979 | 0.00415 | 0.85496 |
| Fam115a    | 3.00709  | 0.00434 | 0.85994 |
| Ndrgr1     | 3.36280  | 0.00487 | 0.85994 |
| Aqp8       | 5.21491  | 0.00495 | 0.85994 |
| Ninl       | 3.09157  | 0.00519 | 0.85994 |
| Ptgr1      | 3.23449  | 0.00528 | 0.85994 |
| Spry4      | 2.46440  | 0.00530 | 0.85994 |
| Nupr1l     | 3.38105  | 0.00553 | 0.85994 |
| Sel1l3     | -2.72199 | 0.00598 | 0.85994 |
| Mir6236    | -2.57149 | 0.00616 | 0.85994 |
| Rab30      | -2.33600 | 0.00622 | 0.85994 |
| Gck        | 3.79659  | 0.00631 | 0.85994 |
| Tmem180    | 2.68998  | 0.00668 | 0.85994 |
| Abca2      | 2.23721  | 0.00682 | 0.85994 |
| St6galnac3 | 5.34922  | 0.00717 | 0.85994 |
| Fam189b    | 3.76044  | 0.00719 | 0.85994 |
| Fblim1     | 2.74404  | 0.00754 | 0.85994 |
| Inhbe      | -3.36994 | 0.00756 | 0.85994 |
| Txnip      | -2.37051 | 0.00765 | 0.85994 |
| Zfp341     | 2.38427  | 0.00766 | 0.85994 |
| Gas7       | 3.01086  | 0.00778 | 0.85994 |
| Pkd2l2     | 2.23569  | 0.00800 | 0.85994 |
| Ccne2      | -3.51905 | 0.00805 | 0.85994 |
| Slc10a2    | -3.19282 | 0.00853 | 0.85994 |
| Suv420h2   | 2.18004  | 0.00875 | 0.85994 |
| Syne1      | 2.15667  | 0.00932 | 0.85994 |
| Sox18      | 2.63855  | 0.00939 | 0.85994 |
| Emcn       | 2.85013  | 0.00967 | 0.85994 |
| Xrcc1      | 2.03290  | 0.00967 | 0.85994 |
| St8sia3    | -4.18529 | 0.00970 | 0.85994 |
| Fam117a    | 2.19941  | 0.01045 | 0.85994 |
| Fitm2      | -2.54370 | 0.01059 | 0.85994 |
| Cnpy4      | 2.06202  | 0.01064 | 0.85994 |
| Nlrp12     | -2.69191 | 0.01068 | 0.85994 |
| BC039771   | -3.44071 | 0.01069 | 0.85994 |
| Praf2      | 2.45950  | 0.01086 | 0.85994 |
| Ldb2       | 2.00786  | 0.01090 | 0.85994 |
| Elovl2     | -2.07563 | 0.01144 | 0.85994 |
| Sprtn      | -2.23847 | 0.01157 | 0.85994 |
| BC021614   | 2.01544  | 0.01173 | 0.85994 |
| Mvd        | 4.49786  | 0.01183 | 0.85994 |
| Gsta2      | 3.20877  | 0.01204 | 0.85994 |
| Mapk7      | 2.19505  | 0.01224 | 0.85994 |
| Pcdhga12   | -7.51584 | 0.01227 | 0.85994 |
| Lipg       | -2.24337 | 0.01243 | 0.85994 |

|               |          |         |         |
|---------------|----------|---------|---------|
| Limd2         | 2.03297  | 0.01251 | 0.85994 |
| Shank2        | 5.49755  | 0.01304 | 0.85994 |
| BC029214      | 2.99297  | 0.01306 | 0.85994 |
| Pltp          | 2.08097  | 0.01353 | 0.85994 |
| Hmgcs1        | 2.83176  | 0.01369 | 0.85994 |
| Gm14305       | -2.44225 | 0.01395 | 0.85994 |
| Ces4a         | -5.74275 | 0.01403 | 0.85994 |
| Ten1          | -2.86583 | 0.01475 | 0.85994 |
| Cdca7         | -2.58843 | 0.01505 | 0.85994 |
| Ptms          | 2.00712  | 0.01569 | 0.85994 |
| Nceh1         | -2.34184 | 0.01611 | 0.85994 |
| Smad9         | -2.71021 | 0.01652 | 0.85994 |
| Nes           | 2.97017  | 0.01666 | 0.85994 |
| 3110001122Rik | -2.00724 | 0.01687 | 0.85994 |
| Mid1          | -2.09508 | 0.01691 | 0.85994 |
| Dbn1          | 3.10081  | 0.01698 | 0.85994 |
| Hmgn5         | 2.28545  | 0.01704 | 0.85994 |
| Npas2         | 35.75054 | 0.01735 | 0.85994 |
| Rwdd3         | 2.25358  | 0.01755 | 0.85994 |
| Cbln3         | 2.50687  | 0.01757 | 0.85994 |
| Smoc2         | 2.07046  | 0.01757 | 0.85994 |
| Cd59b         | 3.34710  | 0.01796 | 0.85994 |
| Ehd2          | 2.39730  | 0.01797 | 0.85994 |
| Fbxl12os      | -2.10366 | 0.01800 | 0.85994 |
| Tbc1d30       | -2.00980 | 0.01854 | 0.85994 |
| Gm16845       | 2.82200  | 0.01859 | 0.85994 |
| Trp53i11      | 2.13859  | 0.01906 | 0.85994 |
| Nim1k         | 2.06705  | 0.01906 | 0.85994 |
| Kcnip3        | 3.25354  | 0.01916 | 0.85994 |
| Plac9b        | 2.56623  | 0.01920 | 0.85994 |
| Tagln2        | 2.31062  | 0.01946 | 0.85994 |
| Dcdc2a        | 2.18496  | 0.01986 | 0.85994 |
| Retsat        | -2.09362 | 0.01992 | 0.85994 |
| Haghl         | 2.27329  | 0.02011 | 0.85994 |
| Tmsb10        | 2.00767  | 0.02013 | 0.85994 |
| Eif4ebp3      | -3.12458 | 0.02038 | 0.85994 |
| Ripply3       | 2.10594  | 0.02046 | 0.85994 |
| Pex11a        | -2.51433 | 0.02052 | 0.85994 |
| Sh2d3c        | 2.00302  | 0.02061 | 0.85994 |
| Prox1         | -2.00449 | 0.02070 | 0.85994 |
| Arhgap24      | 2.36853  | 0.02113 | 0.85994 |
| Cnn2          | 2.28780  | 0.02159 | 0.85994 |
| Dpt           | 2.69283  | 0.02162 | 0.85994 |
| Samd10        | 2.60413  | 0.02213 | 0.85994 |
| Lamb3         | -3.90895 | 0.02227 | 0.85994 |

|               |           |         |         |
|---------------|-----------|---------|---------|
| Mfsd7a        | 2.40335   | 0.02239 | 0.85994 |
| Grk5          | 2.27212   | 0.02325 | 0.85994 |
| Cd74          | 2.13561   | 0.02331 | 0.85994 |
| 2900008C10Rik | 3.21433   | 0.02353 | 0.85994 |
| Epor          | 3.27587   | 0.02353 | 0.85994 |
| Paqr3         | -3.01229  | 0.02364 | 0.85994 |
| Gabra3        | 2.19379   | 0.02390 | 0.85994 |
| Plp1          | 2.25366   | 0.02397 | 0.85994 |
| Adat3         | 3.23634   | 0.02402 | 0.85994 |
| Tmem88        | 2.34216   | 0.02443 | 0.85994 |
| Cdk5r1        | -3.72878  | 0.02457 | 0.85994 |
| Hspa2         | -2.25953  | 0.02463 | 0.85994 |
| Ccdc151       | 2.96285   | 0.02467 | 0.85994 |
| Mgst3         | 2.21430   | 0.02469 | 0.85994 |
| Tdg           | -9.56597  | 0.02471 | 0.85994 |
| Pycard        | 2.75304   | 0.02517 | 0.85994 |
| BC068157      | 3.15267   | 0.02550 | 0.85994 |
| Crtap         | 2.01629   | 0.02550 | 0.85994 |
| Arl1          | -2.24864  | 0.02573 | 0.85994 |
| Slc25a24      | 2.05912   | 0.02593 | 0.85994 |
| Pla2r1        | 2.11542   | 0.02601 | 0.85994 |
| Ndufa4l2      | 3.13046   | 0.02607 | 0.85994 |
| 2210404O09Rik | -2.67468  | 0.02615 | 0.85994 |
| Apoa4         | -4.21184  | 0.02621 | 0.85994 |
| Zc2hc1a       | 3.44276   | 0.02628 | 0.85994 |
| Gm12338       | 51.79957  | 0.02659 | 0.85994 |
| Capn11        | 20.74722  | 0.02662 | 0.85994 |
| Slc36a4       | -3.87909  | 0.02724 | 0.85994 |
| Lynx1         | 2.70053   | 0.02743 | 0.85994 |
| Car15         | 4.88961   | 0.02759 | 0.85994 |
| Kcna2         | 2.33743   | 0.02793 | 0.85994 |
| Atxn7l2       | 2.50702   | 0.02837 | 0.85994 |
| Pde3a         | -5.04353  | 0.02858 | 0.85994 |
| Loxl4         | 5.95203   | 0.02870 | 0.85994 |
| Caprin2       | 2.61529   | 0.02871 | 0.85994 |
| Fkbp10        | 4.35388   | 0.02881 | 0.85994 |
| Cgref1        | -12.36902 | 0.02888 | 0.85994 |
| D030028A08Rik | -2.66457  | 0.02940 | 0.85994 |
| Dact1         | -2.01041  | 0.03015 | 0.85994 |
| Nsun3         | -2.10773  | 0.03023 | 0.85994 |
| Slc41a3       | -2.60313  | 0.03026 | 0.85994 |
| Tert          | 2.83842   | 0.03034 | 0.85994 |
| Zfp773        | 3.20205   | 0.03054 | 0.85994 |
| Entpd7        | -2.02298  | 0.03064 | 0.85994 |
| 4732471J01Rik | -2.86324  | 0.03069 | 0.85994 |

|               |           |         |         |
|---------------|-----------|---------|---------|
| Tmem138       | -2.01672  | 0.03073 | 0.85994 |
| Cxcl9         | 2.55702   | 0.03074 | 0.85994 |
| Al429214      | -2.89895  | 0.03085 | 0.85994 |
| Gucy1a2       | 2.34823   | 0.03195 | 0.85994 |
| G0s2          | -2.44481  | 0.03209 | 0.85994 |
| Fgl1          | -2.39701  | 0.03249 | 0.85994 |
| Gstt3         | 2.45234   | 0.03261 | 0.85994 |
| Gamt          | 2.13469   | 0.03263 | 0.85994 |
| Tle2          | 3.04761   | 0.03264 | 0.85994 |
| Lym7          | -2.07301  | 0.03294 | 0.85994 |
| Prtn3         | -7.25757  | 0.03302 | 0.85994 |
| Agap2         | -2.10082  | 0.03320 | 0.85994 |
| Psd           | 3.14639   | 0.03342 | 0.85994 |
| Eif3j2        | -2.15862  | 0.03356 | 0.85994 |
| Adamts7       | 2.93271   | 0.03401 | 0.85994 |
| Gm14308       | 4.83636   | 0.03406 | 0.85994 |
| Taf4b         | -2.05902  | 0.03458 | 0.85994 |
| Pcyox1l       | 3.19619   | 0.03465 | 0.85994 |
| Zdhhc1        | 2.00737   | 0.03474 | 0.85994 |
| Hspa12b       | 2.18877   | 0.03542 | 0.85994 |
| 1700067K01Rik | 2.59842   | 0.03550 | 0.85994 |
| 9430083A17Rik | -2.94558  | 0.03569 | 0.85994 |
| A630007B06Rik | -2.00238  | 0.03572 | 0.85994 |
| Capg          | 2.79868   | 0.03602 | 0.85994 |
| Tonsl         | 3.19631   | 0.03622 | 0.85994 |
| Gm12505       | -2.06510  | 0.03658 | 0.85994 |
| Tspan4        | -2.19703  | 0.03671 | 0.85994 |
| Adam11        | 2.13355   | 0.03790 | 0.85994 |
| Kazn          | 2.89324   | 0.03807 | 0.85994 |
| Hist1h1c      | -2.10906  | 0.03830 | 0.85994 |
| Cidec         | -14.73152 | 0.03858 | 0.85994 |
| Cyp4a10       | -2.33389  | 0.03927 | 0.85994 |
| Dysf          | 2.17710   | 0.03933 | 0.85994 |
| Saa1          | -6.70784  | 0.03982 | 0.85994 |
| Spata22       | 2.06060   | 0.03982 | 0.85994 |
| 8430427H17Rik | 2.04386   | 0.04004 | 0.85994 |
| Cyp4a14       | -2.91864  | 0.04027 | 0.85994 |
| Dlgap1        | 2.54893   | 0.04043 | 0.85994 |
| Wisp1         | 2.85642   | 0.04075 | 0.85994 |
| Ptpre         | 2.08215   | 0.04101 | 0.85994 |
| D930048N14Rik | 2.44793   | 0.04149 | 0.85994 |
| Ocstamp       | -3.40056  | 0.04151 | 0.85994 |
| Htra1         | 3.91607   | 0.04160 | 0.85994 |
| Tram2         | -2.42259  | 0.04178 | 0.85994 |
| Mlxipl        | 2.30632   | 0.04180 | 0.85994 |

|               |          |         |         |
|---------------|----------|---------|---------|
| Kcnt2         | -4.15047 | 0.04263 | 0.85994 |
| Scarf2        | 2.00973  | 0.04354 | 0.85994 |
| Exoc3l4       | 5.18935  | 0.04356 | 0.85994 |
| Eif3j1        | 6.87007  | 0.04368 | 0.85994 |
| Spsb1         | 2.09653  | 0.04385 | 0.85994 |
| Tmem254c      | 32.35187 | 0.04392 | 0.85994 |
| Saa2          | -7.37119 | 0.04418 | 0.85994 |
| Rbms3         | 2.16305  | 0.04430 | 0.85994 |
| Oas1c         | 3.55080  | 0.04452 | 0.85994 |
| Slc15a2       | -9.56473 | 0.04467 | 0.85994 |
| Gnat1         | -2.07325 | 0.04675 | 0.85994 |
| Gpx6          | 3.34126  | 0.04698 | 0.85994 |
| Apcs          | -2.10778 | 0.04744 | 0.85994 |
| Mapk15        | 3.47288  | 0.04791 | 0.85994 |
| Fam83f        | 2.38268  | 0.04879 | 0.85994 |
| 1810046K07Rik | 2.70794  | 0.04884 | 0.85994 |
| Ppfia4        | 2.51049  | 0.04959 | 0.85994 |
| Slc17a4       | 2.27313  | 0.04986 | 0.85994 |

**Supplementary Table 6: Correlation of Glutathione Pathway Gene Counts with Arthritis Activity and Bioactive Lipid Mediators**

|                        | <b>Gpx6</b> | <b>Gsta2</b> | <b>Gstm1</b> | <b>Gstm2</b> | <b>Gstm3</b> | <b>Gstm6</b> | <b>Gstt3</b> | <b>Mgst3</b> |
|------------------------|-------------|--------------|--------------|--------------|--------------|--------------|--------------|--------------|
| <b>BLMs</b>            |             |              |              |              |              |              |              |              |
| <b>TXB2</b>            | -0.02       | 0.05         | 0.02         | 0.20         | -0.09        | 0.01         | -0.22        | -0.05        |
| <b>6t12epiLTB4</b>     | -0.06       | -0.45#       | -0.66*       | -0.05        | -0.41#       | -0.70*       | -0.10        | -0.66*       |
| <b>LTB4</b>            | 0.05        | -0.68*       | -0.70*       | -0.47#       | -0.49#       | -0.60*       | -0.41#       | -0.61*       |
| <b>15d-D12,14 PGJ2</b> | -0.16       | -0.34        | -0.39        | -0.45#       | -0.36        | -0.43#       | -0.28        | -0.21        |
| <b>13 HODE</b>         | -0.54#      | -0.35        | -0.33        | -0.28        | -0.38        | -0.25        | -0.34        | -0.31        |
| <b>9 HODE</b>          | -0.31       | -0.62*       | -0.69*       | -0.58*       | -0.61*       | -0.64*       | -0.58*       | -0.61*       |
| <b>17S-HDHA</b>        | 0.50#       | -0.54#       | -0.61*       | -0.09        | -0.45#       | -0.59*       | -0.04        | -0.44        |
| <b>15 HETE</b>         | 0.26        | -0.31        | -0.52#       | 0.14         | -0.15        | -0.56#       | -0.22        | -0.36        |
| <b>14S-HDHA</b>        | -0.03       | -0.77*       | -0.86*       | -0.59*       | -0.75*       | -0.80*       | -0.42#       | -0.74*       |
| <b>11 HETE</b>         | -0.03       | -0.59*       | -0.70*       | -0.29        | -0.64*       | -0.69*       | -0.15        | -0.48#       |
| <b>12 HETE</b>         | -0.23       | -0.71*       | -0.81*       | -0.54*       | -0.77*       | -0.79*       | -0.31        | -0.73*       |
| <b>5 HETE</b>          | -0.11       | -0.45#       | -0.67*       | -0.24        | -0.59*       | -0.69*       | -0.20        | -0.46#       |
| <b>5-oxoETE</b>        | -0.05       | -0.56*       | -0.60*       | -0.53        | -0.49#       | -0.53*       | -0.59*       | -0.46#       |

#p ≤ 0.1 \* p < 0.05

# Supplementary Table 7. Hepatic Transcriptome Analysis of PON1Tg Mice Compared to Control Mice Prior to Arthritis Induction

| Kyoto Encyclopedia of Gnes and Genomes (KEGG) Pathway                                                                                                                                               |                                                                                                                           |                 |               |                  |  |
|-----------------------------------------------------------------------------------------------------------------------------------------------------------------------------------------------------|---------------------------------------------------------------------------------------------------------------------------|-----------------|---------------|------------------|--|
| ID                                                                                                                                                                                                  | Genes                                                                                                                     | Fold Enrichment | P Value       | Adjusted P value |  |
| mmu00900:Terpenoid backbone biosynthesis                                                                                                                                                            | MVD, HMGR, FDPs, HMGCS1, MVK                                                                                              | 37.95           | 0.000061      | 0.0004           |  |
| mmu03320:PPAR signaling pathway                                                                                                                                                                     | CYP4A10, SCD1, EHHADH, CYP4A31, CYP4A14, PLTP                                                                             | 6.73            | 0.0058        | 0.1783           |  |
| mmu00071:Fatty acid metabolism                                                                                                                                                                      | CYP4A10, ALDH1B1, EHHADH, CYP4A31, CYP4A14                                                                                | 9.45            | 0.0080        | 0.1648           |  |
| mmu00903:Limonene and pinene degradation                                                                                                                                                            | ALDH1B1, EHHADH, PNPLA3                                                                                                   | 21.25           | 0.0081        | 0.1279           |  |
| mmu00100:Steroid biosynthesis                                                                                                                                                                       | SQLE, NSDHL, FDFT1                                                                                                        | 18.75           | 0.0104        | 0.1309           |  |
| mmu01040:Biosynthesis of unsaturated fatty acids                                                                                                                                                    | SCD1, ACOT2, ACOT1                                                                                                        | 11.81           | 0.0254        | 0.2493           |  |
| mmu00650:Butanoate metabolism                                                                                                                                                                       | ALDH1B1, EHHADH, HMGCS1                                                                                                   | 8.62            | 0.0454        | 0.3589           |  |
| mmu00280:Valine, leucine and isoleucine degradation                                                                                                                                                 | ALDH1B1, EHHADH, HMGCS1                                                                                                   | 6.93            | 0.0669        | 0.4403           |  |
| mmu00561:Glycerolipid metabolism                                                                                                                                                                    | ALDH1B1, LIPG, PNPLA3                                                                                                     | 6.78            | 0.0695        | 0.4151           |  |
| <b>mmu00480:Glutathione metabolism</b>                                                                                                                                                              | <b>GSTM1, GSTM2, GSTM3</b>                                                                                                | <b>6.13</b>     | <b>0.0829</b> | <b>0.4398</b>    |  |
| mmu00330:Arginine and proline metabolism                                                                                                                                                            | ALDH18A1, ALDH1B1, GAMT                                                                                                   | 6.01            | 0.0856        | 0.4202           |  |
| <b>Gene Ontology (GO) Molecular Function Pathway</b>                                                                                                                                                |                                                                                                                           |                 |               |                  |  |
| ID                                                                                                                                                                                                  | Genes                                                                                                                     | Fold Enrichment | P Value       | Adjusted P Value |  |
| GO:0016765~transferase activity, transferring alkyl or aryl (other than methyl) groups                                                                                                              | GSTM1, GSTM2, GSTM3, FDPs, MMAB, FDFT1                                                                                    | 15.19           | 4.27E-05      | 0.0113           |  |
| GO:0004091~carboxylesterase activity                                                                                                                                                                | CHKA, NCEH1, LIPG, ACOT2, ACOT1, PNPLA3                                                                                   | 7.46            | 0.0012        | 0.1482           |  |
| GO:0005520~insulin-like growth factor binding                                                                                                                                                       | WISP1, IGFBP2, IGFBP5                                                                                                     | 18.30           | 0.0113        | 0.6349           |  |
| GO:0018685~alkane 1-monooxygenase activity                                                                                                                                                          | CYP4A10, CYP4A31, CYP4A14                                                                                                 | 134.22          | 0.0147        | 0.6264           |  |
| <b>GO:0004364~glutathione transferase activity</b>                                                                                                                                                  | <b>GSTM1, GSTM2, GSTM3</b>                                                                                                | <b>15.49</b>    | <b>0.0156</b> | <b>0.5666</b>    |  |
| GO:0019838~growth factor binding                                                                                                                                                                    | WISP1, NTRK2, IGFBP2, IGFBP5                                                                                              | 7.46            | 0.0161        | 0.5124           |  |
| GO:0016713~oxidoreductase activity, acting on paired donors, with incorporation or reduction of molecular oxygen, reduced iron-sulfur protein as one donor, and incorporation of one atom of oxygen | CYP4A10, CYP4A31, CYP4A14                                                                                                 | 53.69           | 0.0363        | 0.7550           |  |
| GO:0016790~thiolester hydrolase activity                                                                                                                                                            | USP2, FASN, ACOT2, ACOT1                                                                                                  | 4.97            | 0.0456        | 0.7880           |  |
| GO:0008889~glycerophosphodiester phosphodiesterase activity                                                                                                                                         | GPCPD1, GPPD1                                                                                                             | 33.56           | 0.0575        | 0.8264           |  |
| GO:0048037~cofactor binding                                                                                                                                                                         | HMGR, SQLE, HDC, EHHADH, FASN                                                                                             | 2.97            | 0.0859        | 0.9082           |  |
| GO:0008083~growth factor activity                                                                                                                                                                   | NRG4, CNTF, INHBE, FGF12                                                                                                  | 3.81            | 0.0861        | 0.8867           |  |
| GO:0020037~heme binding                                                                                                                                                                             | CYP2G1, CYP4A10, CYP4A31, CYP26A1, CYP4A14                                                                                | 3.73            | 0.0904        | 0.8775           |  |
| GO:0004659~prenyltransferase activity                                                                                                                                                               | FDPS, FDFT1                                                                                                               | 20.65           | 0.0918        | 0.8605           |  |
| GO:0004806~triacylglycerol lipase activity                                                                                                                                                          | LIPG, PNPLA3                                                                                                              | 19.17           | 0.0985        | 0.8605           |  |
| <b>Gene Ontology (GO) Biological Process Pathway</b>                                                                                                                                                |                                                                                                                           |                 |               |                  |  |
| ID                                                                                                                                                                                                  | Genes                                                                                                                     | Fold Enrichment | P Value       | Adjusted P Value |  |
| GO:0006695~cholesterol biosynthetic process                                                                                                                                                         | MVD, HMGR, INSIG1, FDPs, HMGCS1, MVK, NSDHL, FDFT1                                                                        | 47.26           | 1.96E-10      | 1.79E-07         |  |
| GO:0016126~sterol biosynthetic process                                                                                                                                                              | MVD, HMGR, INSIG1, FDPs, HMGCS1, MVK, NSDHL, FDFT1                                                                        | 36.23           | 1.56E-09      | 7.15E-07         |  |
| GO:0008203~cholesterol metabolic process                                                                                                                                                            | SREBF1, MVD, HMGR, INSIG1, FDPs, HMGCS1, PCSK9, MVK, NSDHL, FDFT1                                                         | 19.41           | 1.80E-09      | 5.50E-07         |  |
| GO:0016125~sterol metabolic process                                                                                                                                                                 | SREBF1, MVD, HMGR, INSIG1, FDPs, HMGCS1, PCSK9, MVK, NSDHL, FDFT1                                                         | 17.65           | 4.28E-09      | 9.81E-07         |  |
| GO:0008299~isoprenoid biosynthetic process                                                                                                                                                          | MVD, HMGR, FDPs, HMGCS1, MVK, FDFT1                                                                                       | 37.06           | 4.43E-07      | 8.11E-05         |  |
| GO:0006694~steroid biosynthetic process                                                                                                                                                             | MVD, HMGR, INSIG1, FDPs, HMGCS1, MVK, NSDHL, FDFT1                                                                        | 15.31           | 7.99E-07      | 1.22E-04         |  |
| GO:0008610~lipid biosynthetic process                                                                                                                                                               | SCD1, CHKA, MVD, HMGR, HMGCS1, FDPs, PNPLA3, FDFT1, ST6GALNAC4, INSIG1, FASN, MVK, NSDHL                                  | 6.20            | 1.05E-06      | 1.37E-04         |  |
| GO:0006720~isoprenoid metabolic process                                                                                                                                                             | MVD, HMGR, FDPs, HMGCS1, CYP26A1, MVK, FDFT1                                                                              | 19.41           | 1.39E-06      | 1.60E-04         |  |
| GO:0008202~steroid metabolic process                                                                                                                                                                | SREBF1, MVD, HMGR, INSIG1, FDPs, HMGCS1, PCSK9, MVK, NSDHL, FDFT1                                                         | 8.44            | 2.56E-06      | 2.61E-04         |  |
| GO:0055114~oxidation reduction                                                                                                                                                                      | CYP2G1, SCD1, PTGR1, ALDH18A1, HMGR, EHHADH, CYP26A1, FDFT1, CYP4A10, SQLE, ALDH1B1, CYP4A31, FASN, LOXL4, CYP4A14, NSDHL | 3.03            | 3.52E-04      | 0.031738         |  |
| GO:0001558~regulation of cell growth                                                                                                                                                                | WISP1, NDN, TNFRSF12A, IGFBP2, CAPRN2, IGFBP5                                                                             | 8.86            | 5.53E-04      | 0.044989         |  |
| GO:0006637~acyl-CoA metabolic process                                                                                                                                                               | EHHADH, ACOT2, ACOT1                                                                                                      | 20.38           | 0.0092        | 0.5049           |  |
| GO:0040008~regulation of growth                                                                                                                                                                     | WISP1, NDN, TNFRSF12A, GAMT, IGFBP2, CAPRN2, IGFBP5                                                                       | 3.72            | 0.0110        | 0.5414           |  |
| GO:0035265~organ growth                                                                                                                                                                             | LY6E, ADRA1B, GJE1                                                                                                        | 18.53           | 0.0110        | 0.5163           |  |
| GO:0006575~cellular amino acid derivative metabolic process                                                                                                                                         | CHKA, LY6E, HDC, GAMT, SLC22A5                                                                                            | 4.82            | 0.0196        | 0.7012           |  |
| GO:0006576~biogenic amine metabolic process                                                                                                                                                         | CHKA, LY6E, HDC, SLC22A5                                                                                                  | 6.79            | 0.0206        | 0.6958           |  |
| GO:0010941~regulation of cell death                                                                                                                                                                 | CNTF, ANK2, CDS9B, KLF10, PYCARD, NLRP12, PCSK9, HSPA1A, HSPA1B, CIDEC, SPP1                                              | 2.41            | 0.0215        | 0.6894           |  |
| GO:0006641~triglyceride metabolic process                                                                                                                                                           | INSIG1, PCSK9, PNPLA3                                                                                                     | 11.32           | 0.0282        | 0.7667           |  |
| GO:0032535~regulation of cellular component size                                                                                                                                                    | FMN1, NDN, TNFRSF12A, ADRA1B, CAPRN2                                                                                      | 4.22            | 0.0300        | 0.7700           |  |
| GO:0006639~acylglycerol metabolic process                                                                                                                                                           | INSIG1, PCSK9, PNPLA3                                                                                                     | 9.48            | 0.0391        | 0.8391           |  |
| GO:0006662~glycerol ether metabolic process                                                                                                                                                         | INSIG1, PCSK9, PNPLA3                                                                                                     | 9.06            | 0.0425        | 0.8494           |  |
| GO:0006638~neutral lipid metabolic process                                                                                                                                                          | INSIG1, PCSK9, PNPLA3                                                                                                     | 9.06            | 0.0425        | 0.8494           |  |
| GO:0051186~cofactor metabolic process                                                                                                                                                               | HMGR, EHHADH, ACOT2, ACOT1, MMAB                                                                                          | 3.73            | 0.0439        | 0.8460           |  |
| GO:0008361~regulation of cell size                                                                                                                                                                  | NDN, TNFRSF12A, ADRA1B, CAPRN2                                                                                            | 5.03            | 0.0442        | 0.8351           |  |
| GO:0006631~fatty acid metabolic process                                                                                                                                                             | CYP4A10, SCD1, EHHADH, CYP4A31, FASN, ACOT1                                                                               | 3.69            | 0.0454        | 0.8304           |  |
| GO:0018904~organic ether metabolic process                                                                                                                                                          | INSIG1, PCSK9, PNPLA3                                                                                                     | 8.49            | 0.0477        | 0.8333           |  |
| GO:0043281~regulation of caspase activity                                                                                                                                                           | PYCARD, NLRP12, HSPA1A, HSPA1B                                                                                            | 8.15            | 0.0514        | 0.8439           |  |
| GO:0052548~regulation of endopeptidase activity                                                                                                                                                     | PYCARD, NLRP12, HSPA1A, HSPA1B                                                                                            | 8.15            | 0.0514        | 0.8439           |  |
| GO:0043067~regulation of programmed cell death                                                                                                                                                      | CNTF, ANK2, KLF10, PYCARD, NLRP12, PCSK9, HSPA1A, HSPA1B, CIDEC, SPP1                                                     | 2.18            | 0.0515        | 0.8338           |  |
| GO:0040007~growth                                                                                                                                                                                   | CNTF, LY6E, NDN, ADRA1B, GJE1                                                                                             | 3.52            | 0.0525        | 0.8285           |  |
| GO:0052547~regulation of peptidase activity                                                                                                                                                         | PYCARD, NLRP12, HSPA1A, HSPA1B                                                                                            | 7.99            | 0.0532        | 0.8221           |  |
| GO:0060348~bone development                                                                                                                                                                         | KLF10, INSIG1, IGFBP5, SPP1                                                                                               | 4.61            | 0.0550        | 0.8220           |  |
| GO:0042304~regulation of fatty acid biosynthetic process                                                                                                                                            | SREBF1, INSIG1                                                                                                            | 30.20           | 0.0637        | 0.8570           |  |
| GO:0046486~glycerolipid metabolic process                                                                                                                                                           | CHKA, INSIG1, PCSK9, PNPLA3                                                                                               | 4.21            | 0.0680        | 0.8669           |  |
| GO:0016042~lipid catabolic process                                                                                                                                                                  | NCEH1, EHHADH, LIPG, PNPLA3                                                                                               | 4.06            | 0.0744        | 0.8831           |  |
| GO:0006732~coenzyme metabolic process                                                                                                                                                               | HMGR, EHHADH, ACOT2, ACOT1                                                                                                | 3.80            | 0.0865        | 0.9126           |  |
| GO:0006766~vitamin metabolic process                                                                                                                                                                | CYP26A1, SLC22A5, MMAB                                                                                                    | 5.91            | 0.0901        | 0.9155           |  |
| GO:0014073~response to tropane                                                                                                                                                                      | ADRA1B, DLG4                                                                                                              | 20.90           | 0.0907        | 0.9111           |  |
| GO:0042220~response to cocaine                                                                                                                                                                      | ADRA1B, DLG4                                                                                                              | 20.90           | 0.0907        | 0.9111           |  |
| GO:0007512~adult heart development                                                                                                                                                                  | ADRA1B, SLC22A5                                                                                                           | 20.90           | 0.0907        | 0.9111           |  |



**Supplementary Table 8: Glutathione Metabolism-related Gene Transcripts Correlate with PON1 Expression among HMDP Livers**

| <b>Gene Number</b> | <b>Probeset ID</b> | <b>Gene Symbol</b> | <b>Gene Name</b>                   | <b>Correlation Coefficients (biweight midcorrelation)</b> |
|--------------------|--------------------|--------------------|------------------------------------|-----------------------------------------------------------|
| 329                | 1416531_at         | Gsto1              | glutathione S-transferase omega 1  | 0.401                                                     |
| 486                | 1422072_a_at       | Gstm6              | glutathione S-transferase, mu 6    | 0.376                                                     |
| 493                | 1423436_at         | Gsta3              | glutathione S-transferase, alpha 3 | 0.375                                                     |
| 885                | 1418186_at         | Gstt1              | glutathione S-transferase, theta 1 | 0.336                                                     |
